# Supplementary material for: Gene regulation by the act of long non-coding RNA transcription
Source: Springer Nature journal article supplement (doi:10.1186/1741-7007-11-59), 2013-05-30

## Regulation *in trans*

### (a) TF inactivation

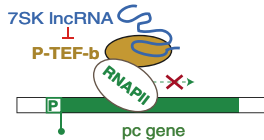

### (b) RNAPII inactivation

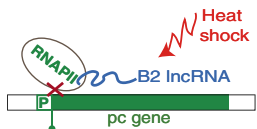

### (d) Regulation by lncRNA product

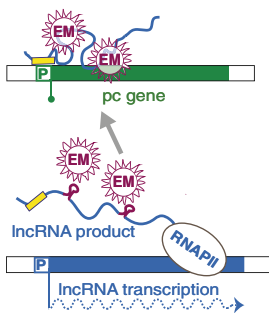

## Regulation *in cis*

### (c) X chromosome inactivation

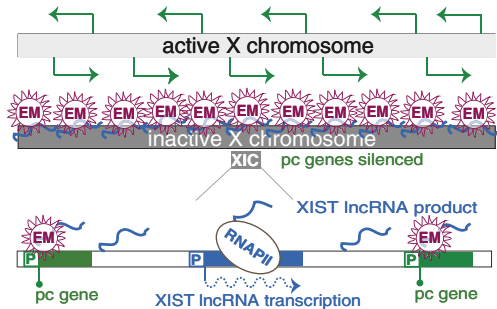

### (e) Regulation by lncRNA product

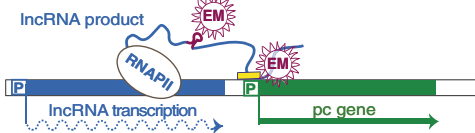

### (f) Regulation by lncRNA transcription

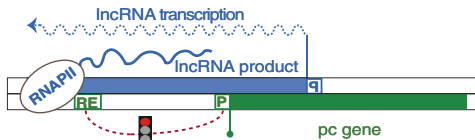

## G. Key

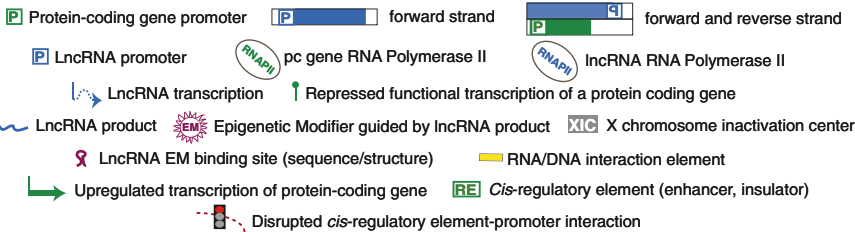

Supplement: 12915_2013_683_MOESM1_ESM.pdf [file 12915_2013_683_MOESM1_ESM.pdf]
