# Supplementary material for: Gene regulation by the act of long non-coding RNA transcription
Source: Springer Nature journal article supplement (doi:10.1186/1741-7007-11-59), 2013-05-30
Supplement: 12915_2013_683_MOESM2_ESM.pdf [file 12915_2013_683_MOESM2_ESM.pdf]

**(a) LncRNA transcription causes increased nucleosome density (yeast)**

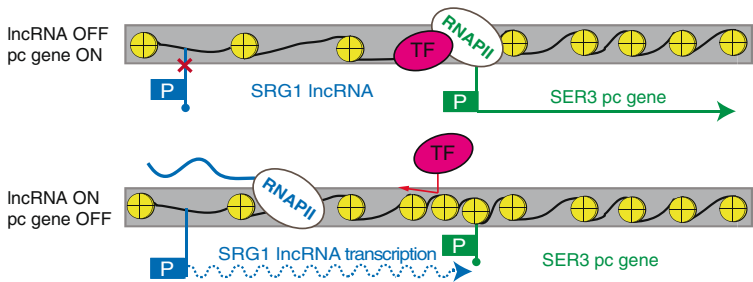

**(b) LncRNA transcription causes repressive histone modifications (yeast)**

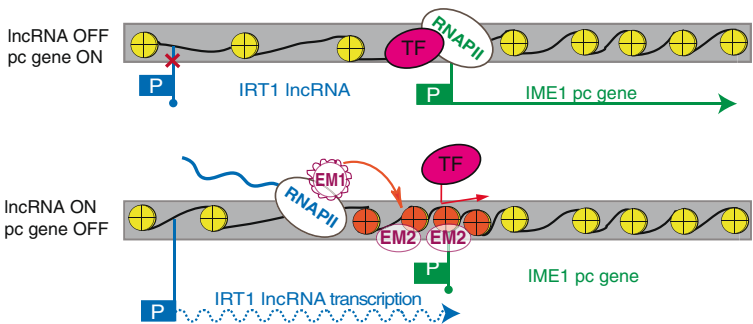

**(c) Aberrant transcription recruits DNA methylation to overlapped promoter (human)**

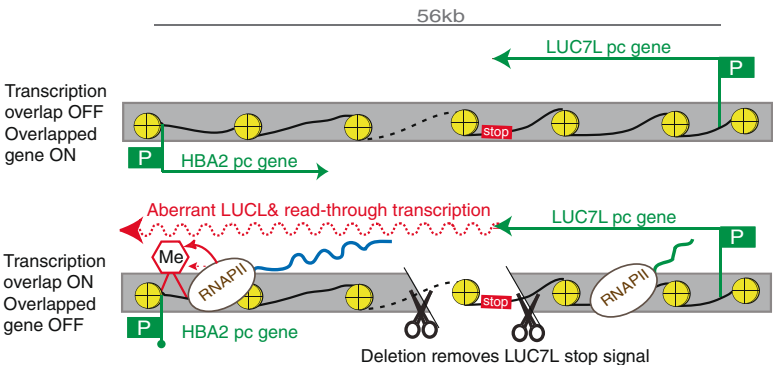

**(d) Key**

Inactive lncRNA promoter      Silenced pc gene promoter

Transcription factors activating pc gene      DNA methylation      Nucleosome

Nucleosome with repressive histone modifications

Epigenetic modifiers travel with RNAPII and deposit H3K4me2 and H3K36me3

Epigenetic modifiers performing deacetylation
