# Supplementary material for: Gene regulation by the act of long non-coding RNA transcription
Source: Springer Nature journal article supplement (doi:10.1186/1741-7007-11-59), 2013-05-30

**(a)** *Airn* lncRNA transcription overlapping silences the paternal *Igf2r* promoter

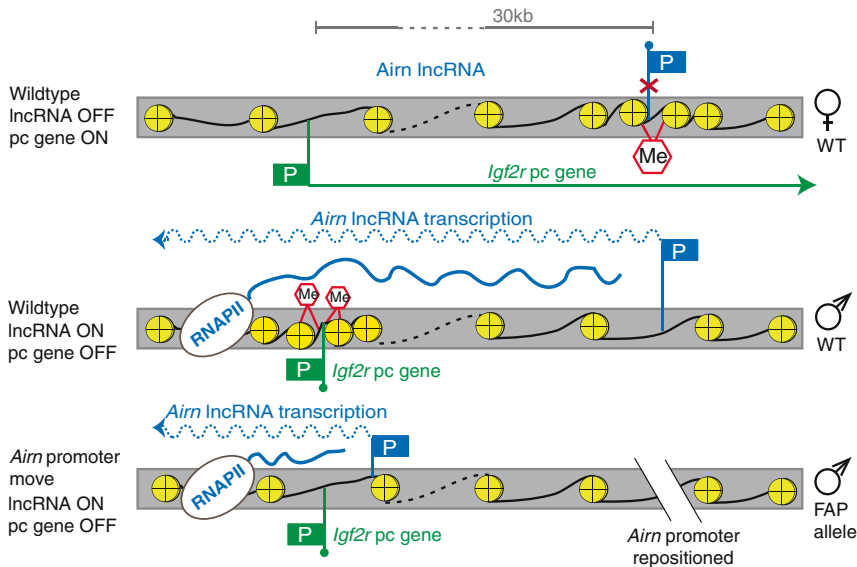

**(b)** lncRNA transcription overlapping enhancer blocks mRNA expression

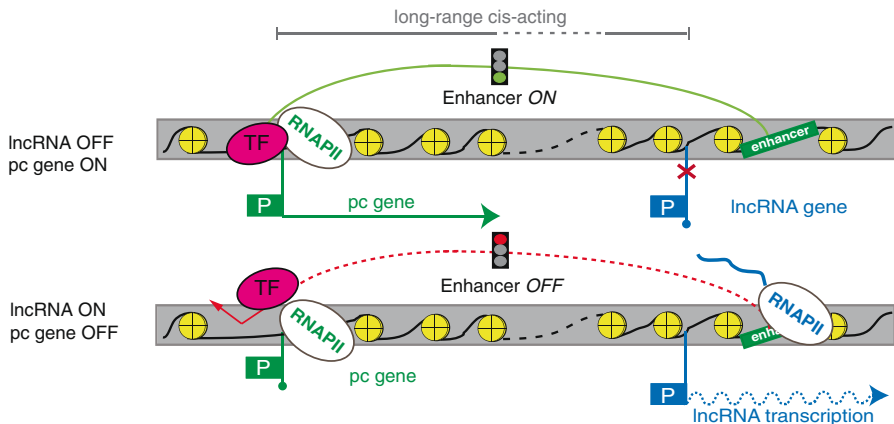

**(c)** Key

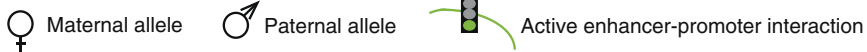

Supplement: 12915_2013_683_MOESM3_ESM.pdf [file 12915_2013_683_MOESM3_ESM.pdf]
