# Supplementary material for: Gene regulation by the act of long non-coding RNA transcription
Source: Springer Nature journal article supplement (doi:10.1186/1741-7007-11-59), 2013-05-30

### (a) LncRNA transcription allows enhancer activity

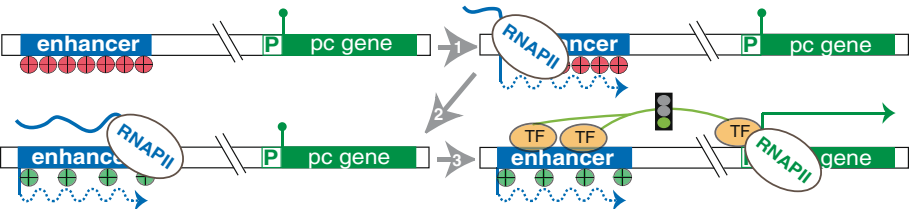

### (b) LncRNA transcription allows VDJ recombination

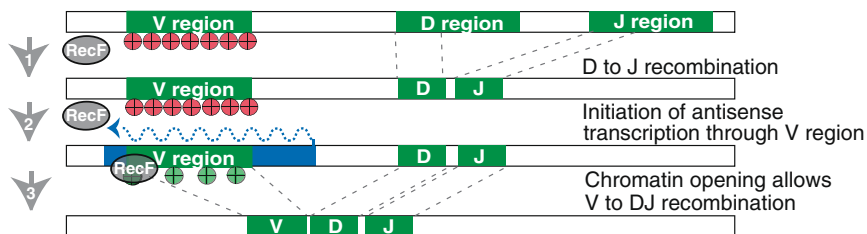

### (c) Expression control at bidirectional promoters

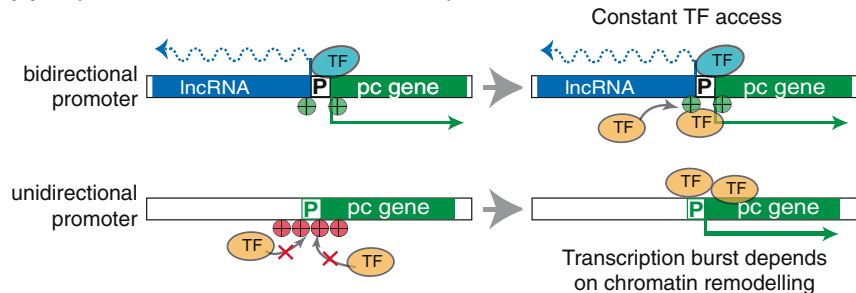

### (d) Key

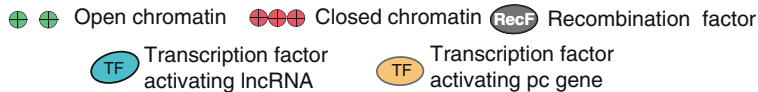

Supplement: 12915_2013_683_MOESM4_ESM.pdf [file 12915_2013_683_MOESM4_ESM.pdf]
